# Supplementary material for: Cell wall proteome of sugarcane stems: comparison of a destructive and a non-destructive extraction method showed differences in glycoside hydrolases and peroxidases
Source: BMC Plant Biol. 2016 Jan 11;16:14. doi: 10.1186/s12870-015-0677-0 (PMC4709929; doi:10.1186/s12870-015-0677-0)
Supplement: Additional file 5: — CWPs identified in 2 month-old sugarcane culms. (XLSX 30.3 kb) [file 12870_2015_677_MOESM5_ESM.xlsx]

## Sheet: Additional file 5
Additional File 5. CWPs identified in 2 month-old sugarcane culms.
* PAC: proteins acting on carbohydrates; LM: proteins related to lipid metabolism; ID: proteins with interaction domains (with proteins ofr polysaccahrides); OR: oxido-reductases; P: proteases; M: miscellaneous proteins; UF: proteins of unknown function; S: signaling.
EST	Sorghum bicolor match	Prediction of sub-cellular location				Functional annotation		Method	Prediction of functional domains
		TargetP	Predotar	SignalP	TMHMM	Functional Class*	Predicted function		InterProScan	Pfam	Prosite
SCCCCL3001B10.b	Sb01g010840.1	S (0.629)	ER (0,99)	YES (0.704)	TMH: 0	PAC	Glycoside hydrolase family 1 (GH1)	2	IPR001360 Glycoside hydrolase, family 1 IPR018120 Glycoside hydrolase, family 1, active site IPR017853 Glycoside hydrolase, superfamily IPR013781 Glycoside hydrolase, catalytic domain	PF00232 Glycosyl hydrolase family 1	PS00001 ASN_GLYCOSYLATION N-glycosylation site. PS00005 PKC_PHOSPHO_SITE Protein kinase C phosphorylation site. PS00006 CK2_PHOSPHO_SITE Casein kinase II phosphorylation site. PS00007 TYR_PHOSPHO_SITE Tyrosine kinase phosphorylation site. PS00008 MYRISTYL N-myristoylation site. PS00653 GLYCOSYL_HYDROL_F1_2 Glycosyl hydrolases family 1 N-terminal signature.
SCJFLR1017E03	Sb01g010840.1	M (0.299)	ER (0,99)	YES (0.810)	TMH: 0	PAC	Glycoside hydrolase family 1 (GH1)	2	IPR001360 Glycoside hydrolase, family 1 IPR018120 Glycoside hydrolase, family 1, active site IPR017853 Glycoside hydrolase, superfamily IPR013781 Glycoside hydrolase, catalytic domain	PF00232 Glycosyl hydrolase family 1	PS00001 ASN_GLYCOSYLATION N-glycosylation site. PS00005 PKC_PHOSPHO_SITE Protein kinase C phosphorylation site. PS00006 CK2_PHOSPHO_SITE Casein kinase II phosphorylation site. PS00007 TYR_PHOSPHO_SITE Tyrosine kinase phosphorylation site. PS00008 MYRISTYL N-myristoylation site. PS00653 GLYCOSYL_HYDROL_F1_2 Glycosyl hydrolases family 1 N-terminal signature.
SCEQLB1066E08	Sb01g010825.1	C (0.628)	plastid (0,80)	YES (0.643)	TMH: 2 (391-413) (542-564)	PAC	Glycoside hydrolase family 1 (GH1)	2	IPR001360 Glycoside hydrolase, family 1 IPR018120 Glycoside hydrolase, family 1, active site IPR013781 Glycoside hydrolase, catalytic domain IPR017853 Glycoside hydrolase, superfamily	PF00232 Glycosyl hydrolase family 1	PS00001 ASN_GLYCOSYLATION N-glycosylation site. PS00003 SULFATION Tyrosine sulfation site. PS00005 PKC_PHOSPHO_SITE Protein kinase C phosphorylation site. PS00006 CK2_PHOSPHO_SITE Casein kinase II phosphorylation site. PS00007 TYR_PHOSPHO_SITE Tyrosine kinase phosphorylation site. PS00008 MYRISTYL N-myristoylation site. PS00653 GLYCOSYL_HYDROL_F1_2 Glycosyl hydrolases family 1 N-terminal signatur…
SCEQHR1082B01	Sb02g028400.1	S (0.970)	ER (0,99)	YES (0.794)	TMH: 0	PAC	Glycoside hydrolase family 1 (GH1)	2	IPR001360 Glycoside hydrolase, family 1 IPR018120 Glycoside hydrolase, family 1, active site IPR013781 Glycoside hydrolase, catalytic domain IPR017853 Glycoside hydrolase, superfamily	PF00232 Glycosyl hydrolase family 1	PS00001 ASN_GLYCOSYLATION N-glycosylation site. PS00003 SULFATION Tyrosine sulfation site. PS00004 CAMP_PHOSPHO_SITE cAMP- and cGMP-dependent protein kinase phosphorylation site. PS00005 PKC_PHOSPHO_SITE Protein kinase C phosphorylation site. PS00006 CK2_PHOSPHO_SITE Casein kinase II phosphorylation site. PS00007 TYR_PHOSPHO_SITE Tyrosine kinase phosphorylation site. PS00008 MYRISTYL N-myristoyla…
SCEZLB1007A09	Sb01g008030.2	C (0.920) versions .4 and .5 with predicted signal peptide	possibly mitochondrial (0,32)	YES (0.907)	TMH: 2 (38-60) (73-95)	PAC	Glycoside hydrolase family 3 (GH3)	2	IPR001764 Glycoside hydrolase, family 3, N-terminal IPR002772 Glycoside hydrolase family 3 C-terminal domain IPR026892 Glycoside hydrolase family 3 IPR017853 Glycoside hydrolase, superfamily	PF01915 Glycosyl hydrolase family 3 C terminal domain PF00933 Glycosyl hydrolase family 3 N terminal domain	PS00001 ASN_GLYCOSYLATION N-glycosylation site. PS00005 PKC_PHOSPHO_SITE Protein kinase C phosphorylation site. PS00006 CK2_PHOSPHO_SITE Casein kinase II phosphorylation site. PS00008 MYRISTYL N-myristoylation site.
SCEQLR1093F09	Sb01g008040.3	S (0.808)	ER (0,99)	YES (0.867)	TMH: 0	PAC	Glycoside hydrolase family 3 (GH3)	1 and 2	IPR002772 Glycoside hydrolase family 3 C-terminal domain IPR001764 Glycoside hydrolase, family 3, N-terminal IPR026892 Glycoside hydrolase family 3 IPR017853 Glycoside hydrolase, superfamily	PF01915 Glycosyl hydrolase family 3 C terminal domain PF00933 Glycosyl hydrolase family 3 N terminal domain	PS00001 ASN_GLYCOSYLATION N-glycosylation site. PS00005 PKC_PHOSPHO_SITE Protein kinase C phosphorylation site. PS00006 CK2_PHOSPHO_SITE Casein kinase II phosphorylation site. PS00007 TYR_PHOSPHO_SITE Tyrosine kinase phosphorylation site. PS00008 MYRISTYL N-myristoylation site. PS00009 AMIDATION Amidation site.
SCCCCL4009F05	Sb06g030270.1	S (0.926)	ER (0,99)	YES (0.908)	TMH: 0	PAC	Glycoside hydrolase family 3 (GH3)	2	IPR001764 Glycoside hydrolase, family 3, N-terminal IPR002772 Glycoside hydrolase family 3 C-terminal domain IPR026891 Fibronectin type III-like domain IPR026892 Glycoside hydrolase family 3 IPR017853 Glycoside hydrolase, superfamily	PF00933 Glycosyl hydrolase family 3 N terminal domain PF01915 Glycosyl hydrolase family 3 C terminal domain PF14310 Fibronectin type III-like domain	PS00001 ASN_GLYCOSYLATION N-glycosylation site. PS00005 PKC_PHOSPHO_SITE Protein kinase C phosphorylation site. PS00006 CK2_PHOSPHO_SITE Casein kinase II phosphorylation site. PS00008 MYRISTYL N-myristoylation site. PS50310 ALA_RICH Alanine-rich region profile. PS00016 RGD Cell attachment sequence. PS00029 LEUCINE_ZIPPER Leucine zipper pattern.
SCQSAM1030G04	Sb06g030270.1	S (0.926)	ER (0,99)	YES (0.908)	TMH: 0	PAC	Glycoside hydrolase family 3 (GH3)	2	IPR001764 Glycoside hydrolase, family 3, N-terminal IPR002772 Glycoside hydrolase family 3 C-terminal domain IPR026891 Fibronectin type III-like domain IPR026892 Glycoside hydrolase family 3 IPR017853 Glycoside hydrolase, superfamily	PF00933 Glycosyl hydrolase family 3 N terminal domain PF01915 Glycosyl hydrolase family 3 C terminal domain PF14310 Fibronectin type III-like domain	PS00001 ASN_GLYCOSYLATION N-glycosylation site. PS00005 PKC_PHOSPHO_SITE Protein kinase C phosphorylation site. PS00006 CK2_PHOSPHO_SITE Casein kinase II phosphorylation site. PS00008 MYRISTYL N-myristoylation site. PS50310 ALA_RICH Alanine-rich region profile. PS00016 RGD Cell attachment sequence. PS00029 LEUCINE_ZIPPER Leucine zipper pattern.
SCQSRT2031D12	Sb03g045490.1	S (0.805)	ER (0,96)	YES (0.697)	TMH: 1 (7-29)	PAC	Glycoside hydrolase family 17 (GH17)	2	IPR000490 Glycoside hydrolase, family 17 IPR013781 Glycoside hydrolase, catalytic domain IPR017853 Glycoside hydrolase, superfamily	PF00332 Glycosyl hydrolases family 17	PS00004 CAMP_PHOSPHO_SITE cAMP- and cGMP-dependent protein kinase phosphorylation site. PS00005 PKC_PHOSPHO_SITE Protein kinase C phosphorylation site. PS00006 CK2_PHOSPHO_SITE Casein kinase II phosphorylation site. PS00008 MYRISTYL N-myristoylation site. PS00587 GLYCOSYL_HYDROL_F17 Glycosyl hydrolases family 17 signature.
SCVPRZ3029G05	Sb03g040600.1	S (0.843)	ER (0,97)	YES (0.769)	TMH: 1 (7-29)	PAC	Glycoside hydrolase family 18 (GH18)	2	IPR001223 Glycoside hydrolase, family 18, catalytic domain IPR001579 Glycoside hydrolase, chitinase active site IPR013781 Glycoside hydrolase, catalytic domain IPR017853 Glycoside hydrolase, superfamily	PF00704 Glycosyl hydrolases family 18	PS00001 ASN_GLYCOSYLATION N-glycosylation site. PS00005 PKC_PHOSPHO_SITE Protein kinase C phosphorylation site. PS00006 CK2_PHOSPHO_SITE Casein kinase II phosphorylation site. PS00008 MYRISTYL N-myristoylation site. PS00009 AMIDATION Amidation site. PS01095 CHITINASE_18 Chitinases family 18 active site.
SCJLLB2076C12	Sb06g021220.1	S (0.979)	ER (0,99)	YES (0.896)	TMH: 1 (7-26)	PAC	Glycoside hydrolase family 19 (GH19)	2	IPR000726 Glycoside hydrolase, family 19, catalytic IPR001002 Chitin-binding, type 1 IPR018371 Chitin-binding, type 1, conserved site IPR016283 Glycoside hydrolase, family 19 IPR023346 Lysozyme-like domain	PF00182 Chitinase class I PF00187 Chitin recognition protein	PS00001 ASN_GLYCOSYLATION N-glycosylation site. PS00005 PKC_PHOSPHO_SITE Protein kinase C phosphorylation site. PS00006 CK2_PHOSPHO_SITE Casein kinase II phosphorylation site. PS00008 MYRISTYL N-myristoylation site. PS00009 AMIDATION Amidation site. PS01186 EGF_2 EGF-like domain signature 2. PS00026 CHIT_BIND_I_1 Chitin recognition or binding domain signature. PS50941 CHIT_BIND_I_2 Chitin-binding…
SCEZRZ3015E11	Sb01g048140.1	S (0.952)	ER (0,99)	YES (0.742)	TMH: 1 (7-29)	PAC	Glycoside hydrolase family 19 (GH19)	2	IPR000726 Glycoside hydrolase, family 19, catalytic IPR016283 Glycoside hydrolase, family 19 IPR023346 Lysozyme-like domain	PF00182 Chitinase class I	PS00004 CAMP_PHOSPHO_SITE cAMP- and cGMP-dependent protein kinase phosphorylation site. PS00005 PKC_PHOSPHO_SITE Protein kinase C phosphorylation site. PS00006 CK2_PHOSPHO_SITE Casein kinase II phosphorylation site. PS00008 MYRISTYL N-myristoylation site. PS00016 RGD Cell attachment sequence. PS00774 CHITINASE_19_2 Chitinases family 19 signature 2.
SCCCCL5004G07	Sb10g000660.1	S (0.520)	possibly mitochondrial (0,26)	YES (0.643)	TMH: 0	PAC	Glycoside hydrolase family 28 (GH28)	2	IPR000743 Glycoside hydrolase, family 28 IPR006626 Parallel beta-helix repeat IPR011050 Pectin lyase fold/virulence factor IPR012334 Pectin lyase fold	PF00295 Glycosyl hydrolases family 28	PS00001 ASN_GLYCOSYLATION N-glycosylation site. PS00004 CAMP_PHOSPHO_SITE cAMP- and cGMP-dependent protein kinase phosphorylation site. PS00005 PKC_PHOSPHO_SITE Protein kinase C phosphorylation site. PS00006 CK2_PHOSPHO_SITE Casein kinase II phosphorylation site. PS00007 TYR_PHOSPHO_SITE Tyrosine kinase phosphorylation site. PS00008 MYRISTYL N-myristoylation site.
SCJFRT1007G04	Sb10g000660.1	S (0.624)	mitochondrial (0,62)	YES (0.718)	TMH: 0	PAC	Glycoside hydrolase family 28 (GH28)	2	IPR000743 Glycoside hydrolase, family 28 IPR006626 Parallel beta-helix repeat IPR011050 Pectin lyase fold/virulence factor IPR012334 Pectin lyase fold	PF00295 Glycosyl hydrolases family 28	PS00001 ASN_GLYCOSYLATION N-glycosylation site. PS00004 CAMP_PHOSPHO_SITE cAMP- and cGMP-dependent protein kinase phosphorylation site. PS00005 PKC_PHOSPHO_SITE Protein kinase C phosphorylation site. PS00006 CK2_PHOSPHO_SITE Casein kinase II phosphorylation site. PS00007 TYR_PHOSPHO_SITE Tyrosine kinase phosphorylation site. PS00008 MYRISTYL N-myristoylation site.
SCCCCL6004H07	Sb01g040750.1	S (0.977)	ER (0,95)	YES (0.580)	TMH: 1 (7-29)	PAC	Glycoside hydrolase family 35 (GH35)	2	IPR001944 Glycoside hydrolase, family 35 IPR000922 D-galactoside/L-rhamnose binding SUEL lectin domain IPR008979 Galactose-binding domain-like IPR013781 Glycoside hydrolase, catalytic domain IPR019801 Glycoside hydrolase, family 35, conserved site IPR017853 Glycoside hydrolase, superfamily	PF01301 Glycosyl hydrolases family 35 PF02140 Galactose binding lectin domain	PS00001 ASN_GLYCOSYLATION N-glycosylation site. PS00003 SULFATION Tyrosine sulfation site. PS00005 PKC_PHOSPHO_SITE Protein kinase C phosphorylation site. PS00006 CK2_PHOSPHO_SITE Casein kinase II phosphorylation site. PS00007 TYR_PHOSPHO_SITE Tyrosine kinase phosphorylation site. PS00008 MYRISTYL N-myristoylation site. PS00009 AMIDATION Amidation site. PS50228 SUEL_LECTIN SUEL-type lectin domain…
SCVPRZ3029F03	Sb03g029700.1	M (0.837)	ER (0,74)	YES (0.688)	TMH: 0	PAC	Acyl esterase (homologous to AtPMR5)	2	IPR025846 PMR5 N-terminal domain IPR026057 PC-Esterase	PF13839 GDSL/SGNH-like Acyl-Esterase family found in Pmr5 and Cas1p PF14416 PMR5 N terminal Domain	PS00001 ASN_GLYCOSYLATION N-glycosylation site. PS00003 SULFATION Tyrosine sulfation site. PS00005 PKC_PHOSPHO_SITE Protein kinase C phosphorylation site. PS00006 CK2_PHOSPHO_SITE Casein kinase II phosphorylation site. PS00008 MYRISTYL N-myristoylation site. PS00009 AMIDATION Amidation site.
SCSGLR1025E03	Sb02g042780.1	M (0.457)	ER (0,73)	NO	TMH: 1 (13-35)	PAC	PME	1 and 2	IPR006501 Pectinesterase inhibitor IPR000070 Pectinesterase, catalytic IPR011050 Pectin lyase fold/virulence factor IPR018040 Pectinesterase, active site IPR012334 Pectin lyase fold	PF04043 Plant invertase/pectin methylesterase inhibitor PF01095 Pectinesterase	PS00001 ASN_GLYCOSYLATION N-glycosylation site. PS00005 PKC_PHOSPHO_SITE Protein kinase C phosphorylation site. PS00006 CK2_PHOSPHO_SITE Casein kinase II phosphorylation site. PS00007 TYR_PHOSPHO_SITE Tyrosine kinase phosphorylation site. PS00008 MYRISTYL N-myristoylation site. PS50310 ALA_RICH Alanine-rich region profile. PS50323 ARG_RICH Arginine-rich region profile. PS00015 NUCLEAR Bipartite n…
SCCCRZ1002B03	Sb01g041770.1	S (0.950)	ER (0,78)	YES (0.738)	TMH: 0	OR	Peroxidase (SbPrx20)	1	IPR002016 Haem peroxidase, plant/fungal/bacterial IPR010255 Haem peroxidase IPR000823 Plant peroxidase IPR019793 Peroxidases heam-ligand binding site	PF00141 Peroxidase 66-392	PS00001 ASN_GLYCOSYLATION N-glycosylation site. PS00003 SULFATION Tyrosine sulfation site. PS00004 CAMP_PHOSPHO_SITE cAMP- and cGMP-dependent protein kinase phosphorylation site. PS00005 PKC_PHOSPHO_SITE Protein kinase C phosphorylation site. PS00006 CK2_PHOSPHO_SITE Casein kinase II phosphorylation site. PS00008 MYRISTYL N-myristoylation site. PS00009 AMIDATION Amidation site. PS00435 PEROXIDASE…
SCCCRT1001G12	Sb04g008590.1	S (0.788)	ER (0,98)	NO	TMH: 1 (7-29)	OR	Peroxidase (SbPrx71)	1 and 2	IPR002016 Haem peroxidase, plant/fungal/bacterial IPR010255 Haem peroxidase IPR019794 Peroxidase, active site IPR000823 Plant peroxidase IPR019793 Peroxidases heam-ligand binding site	PF00141 Peroxidase 66-392	PS00001 ASN_GLYCOSYLATION N-glycosylation site. PS00004 CAMP_PHOSPHO_SITE cAMP- and cGMP-dependent protein kinase phosphorylation site. PS00005 PKC_PHOSPHO_SITE Protein kinase C phosphorylation site. PS00006 CK2_PHOSPHO_SITE Casein kinase II phosphorylation site. PS00008 MYRISTYL N-myristoylation site. PS00009 AMIDATION Amidation site. PS00435 PEROXIDASE_1 Peroxidases proximal heme-ligand signatu…
SCCCLB1004B09	Sb10g027490.1	S (0.775)	ER (0,99)	YES (0.727)	TMH: 1 (5-22)	OR	Peroxidase (SbPrx139)	1	IPR002016 Haem peroxidase, plant/fungal/bacterial IPR010255 Haem peroxidase IPR000823 Plant peroxidase IPR019793 Peroxidases heam-ligand binding site	PF00141 Peroxidase 66-392	PS00001 ASN_GLYCOSYLATION N-glycosylation site. PS00005 PKC_PHOSPHO_SITE Protein kinase C phosphorylation site. PS00006 CK2_PHOSPHO_SITE Casein kinase II phosphorylation site. PS00007 TYR_PHOSPHO_SITE Tyrosine kinase phosphorylation site. PS00008 MYRISTYL N-myristoylation site. PS00009 AMIDATION Amidation site. PS00435 PEROXIDASE_1 Peroxidases proximal heme-ligand signature. PS50873 PEROXIDASE_4 …
SCEQRT2030A04	Sb10g027490.1	S (0.941)	ER (0,99)	YES (0.831)	TMH: 1 (5-27)	OR	Peroxidase (SbPrx139)	1	IPR002016 Haem peroxidase, plant/fungal/bacterial IPR010255 Haem peroxidase IPR000823 Plant peroxidase IPR019793 Peroxidases heam-ligand binding site	PF00141 Peroxidase 66-392	PS00001 ASN_GLYCOSYLATION N-glycosylation site. PS00005 PKC_PHOSPHO_SITE Protein kinase C phosphorylation site. PS00006 CK2_PHOSPHO_SITE Casein kinase II phosphorylation site. PS00007 TYR_PHOSPHO_SITE Tyrosine kinase phosphorylation site. PS00008 MYRISTYL N-myristoylation site. PS00009 AMIDATION Amidation site. PS00435 PEROXIDASE_1 Peroxidases proximal heme-ligand signature. PS50873 PEROXIDASE_4 …
SCCCLR1C03A09	Sb09g004650.1	S (0.837)	ER (0,99)	YES (0.912)	TMH: 0	OR	Peroxidase (SbPrx115)	1	IPR002016 Haem peroxidase, plant/fungal/bacterial IPR010255 Haem peroxidase IPR019794 Peroxidase, active site IPR000823 Plant peroxidase IPR019793 Peroxidases heam-ligand binding site	PF00141 Peroxidase 66-392	PS00001 ASN_GLYCOSYLATION N-glycosylation site. PS00005 PKC_PHOSPHO_SITE Protein kinase C phosphorylation site. PS00006 CK2_PHOSPHO_SITE Casein kinase II phosphorylation site. PS00008 MYRISTYL N-myristoylation site. PS00009 AMIDATION Amidation site. PS00435 PEROXIDASE_1 Peroxidases proximal heme-ligand signature. PS00436 PEROXIDASE_2 Peroxidases active site signature. PS50873 PEROXIDASE_4 Plant h…
SCCCLR1C05G08	Sb03g024460.1	S (0.949)	ER (0,99)	YES (0.758)	TMH: 0	OR	Peroxidase (SbPrx65)	1	IPR002016 Haem peroxidase, plant/fungal/bacterial IPR010255 Haem peroxidase IPR019794 Peroxidase, active site IPR000823 Plant peroxidase IPR019793 Peroxidases heam-ligand binding site	PF00141 Peroxidase 66-392	PS00001 ASN_GLYCOSYLATION N-glycosylation site. PS00004 CAMP_PHOSPHO_SITE cAMP- and cGMP-dependent protein kinase phosphorylation site. PS00005 PKC_PHOSPHO_SITE Protein kinase C phosphorylation site. PS00006 CK2_PHOSPHO_SITE Casein kinase II phosphorylation site. PS00008 MYRISTYL N-myristoylation site. PS00009 AMIDATION Amidation site. PS00435 PEROXIDASE_1 Peroxidases proximal heme-ligand signatu…
SCRLAD1042E05	Sb09g002740.1	S (0.950)	ER (0,99)	YES (0.805)	TMH: 0	OR	Peroxidase (SbPrx108)	1 and 2	IPR002016 Haem peroxidase, plant/fungal/bacterial IPR010255 Haem peroxidase IPR019794 Peroxidase, active site IPR000823 Plant peroxidase IPR019793 Peroxidases heam-ligand binding site	PF00141 Peroxidase 66-392	PS00001 ASN_GLYCOSYLATION N-glycosylation site. PS00005 PKC_PHOSPHO_SITE Protein kinase C phosphorylation site. PS00006 CK2_PHOSPHO_SITE Casein kinase II phosphorylation site. PS00007 TYR_PHOSPHO_SITE Tyrosine kinase phosphorylation site. PS00008 MYRISTYL N-myristoylation site. PS00435 PEROXIDASE_1 Peroxidases proximal heme-ligand signature. PS00436 PEROXIDASE_2 Peroxidases active site signature.…
SCVPRZ2035F03	Sb09g002740.1	S (0.950)	ER (0,99)	YES (0.805)	TMH: 0	OR	Peroxidase (SbPrx108)	1 and 2	IPR002016 Haem peroxidase, plant/fungal/bacterial IPR010255 Haem peroxidase IPR019794 Peroxidase, active site IPR000823 Plant peroxidase IPR019793 Peroxidases heam-ligand binding site	PF00141 Peroxidase 66-392	PS00001 ASN_GLYCOSYLATION N-glycosylation site. PS00005 PKC_PHOSPHO_SITE Protein kinase C phosphorylation site. PS00006 CK2_PHOSPHO_SITE Casein kinase II phosphorylation site. PS00007 TYR_PHOSPHO_SITE Tyrosine kinase phosphorylation site. PS00008 MYRISTYL N-myristoylation site. PS00435 PEROXIDASE_1 Peroxidases proximal heme-ligand signature. PS00436 PEROXIDASE_2 Peroxidases active site signature.…
SCVPLB1020D03	Sb03g046760.1	S (0.767)	ER (0,99)	YES (0.780)	TMH: 1 (12-34)	OR	Peroxidase (SbPrx68)	1	IPR002016 Haem peroxidase, plant/fungal/bacterial IPR010255 Haem peroxidase IPR019794 Peroxidase, active site IPR000823 Plant peroxidase IPR019793 Peroxidases heam-ligand binding site	PF00141 Peroxidase 66-392	PS00001 ASN_GLYCOSYLATION N-glycosylation site. PS00005 PKC_PHOSPHO_SITE Protein kinase C phosphorylation site. PS00006 CK2_PHOSPHO_SITE Casein kinase II phosphorylation site. PS00008 MYRISTYL N-myristoylation site. PS00009 AMIDATION Amidation site. PS00435 PEROXIDASE_1 Peroxidases proximal heme-ligand signature. PS00436 PEROXIDASE_2 Peroxidases active site signature. PS50873 PEROXIDASE_4 Plant h…
SCEPRZ1011A06	Sb03g010250.1	S (0.869)	ER (0,99)	YES (0.899)	TMH: 1 (7-29)	OR	Peroxidase (SbPrx54)	1 and 2	IPR002016 Haem peroxidase, plant/fungal/bacterial IPR010255 Haem peroxidase IPR019794 Peroxidase, active site IPR000823 Plant peroxidase IPR019793 Peroxidases heam-ligand binding site	PF00141 Peroxidase 66-392	PS00001 ASN_GLYCOSYLATION N-glycosylation site. PS00004 CAMP_PHOSPHO_SITE cAMP- and cGMP-dependent protein kinase phosphorylation site. PS00005 PKC_PHOSPHO_SITE Protein kinase C phosphorylation site. PS00006 CK2_PHOSPHO_SITE Casein kinase II phosphorylation site. PS00008 MYRISTYL N-myristoylation site. PS00009 AMIDATION Amidation site. PS00029 LEUCINE_ZIPPER Leucine zipper pattern. PS00435 PEROXI…
SCCCAD1001B08	Sb03g010740.1	M (0.923)	possibly ER (0,66)	NO	TMH: 1 (21-43)	OR	Peroxidase (SbPrx55)	2	IPR002016 Haem peroxidase, plant/fungal/bacterial IPR010255 Haem peroxidase IPR000823 Plant peroxidase IPR019793 Peroxidases heam-ligand binding site	PF00141 Peroxidase 66-392	PS00001 ASN_GLYCOSYLATION N-glycosylation site. PS00004 CAMP_PHOSPHO_SITE cAMP- and cGMP-dependent protein kinase phosphorylation site. PS00005 PKC_PHOSPHO_SITE Protein kinase C phosphorylation site. PS00006 CK2_PHOSPHO_SITE Casein kinase II phosphorylation site. PS00008 MYRISTYL N-myristoylation site. PS00009 AMIDATION Amidation site. PS00435 PEROXIDASE_1 Peroxidases proximal heme-ligand signatu…
SCJFRZ2013F04								2
SCJLRT1019B02								2
SCEQRT1024D03	Sb03g010740.1	M (0.925)	none (0,89)	NO	TMH: 0	OR	Peroxidase (SbPrx55)	2	IPR002016 Haem peroxidase, plant/fungal/bacterial IPR010255 Haem peroxidase IPR000823 Plant peroxidase IPR019793 Peroxidases heam-ligand binding site	PF00141 Peroxidase 66-392	PS00001 ASN_GLYCOSYLATION N-glycosylation site. PS00004 CAMP_PHOSPHO_SITE cAMP- and cGMP-dependent protein kinase phosphorylation site. PS00005 PKC_PHOSPHO_SITE Protein kinase C phosphorylation site. PS00006 CK2_PHOSPHO_SITE Casein kinase II phosphorylation site. PS00008 MYRISTYL N-myristoylation site. PS00009 AMIDATION Amidation site. PS00435 PEROXIDASE_1 Peroxidases proximal heme-ligand signatu…
SCCCAD1001C08	Sb02g042860.1	S (0.980)	ER (0,99)	YES (0.870)	TMH: 1 (2-24)	OR	Peroxidase (SbPrx47)	2	IPR002016 Haem peroxidase, plant/fungal/bacterial IPR010255 Haem peroxidase IPR019794 Peroxidase, active site IPR000823 Plant peroxidase IPR019793 Peroxidases heam-ligand binding site	PF00141 Peroxidase 66-392	PS00001 ASN_GLYCOSYLATION N-glycosylation site. PS00004 CAMP_PHOSPHO_SITE cAMP- and cGMP-dependent protein kinase phosphorylation site. PS00005 PKC_PHOSPHO_SITE Protein kinase C phosphorylation site. PS00006 CK2_PHOSPHO_SITE Casein kinase II phosphorylation site. PS00008 MYRISTYL N-myristoylation site. PS00009 AMIDATION Amidation site. PS00435 PEROXIDASE_1 Peroxidases proximal heme-ligand signatu…
SCQSST3114C09	Sb01g031740.1	-	none (0,88)	YES (0.603)	TMH: 0	OR	Peroxidase (SbPrx87)	2	IPR002016 Haem peroxidase, plant/fungal/bacterial IPR010255 Haem peroxidase IPR019794 Peroxidase, active site IPR000823 Plant peroxidase IPR019793 Peroxidases heam-ligand binding site	PF00141 Peroxidase 66-392	PS00001 ASN_GLYCOSYLATION N-glycosylation site. PS00003 SULFATION Tyrosine sulfation site. PS00004 CAMP_PHOSPHO_SITE cAMP- and cGMP-dependent protein kinase phosphorylation site. PS00005 PKC_PHOSPHO_SITE Protein kinase C phosphorylation site. PS00006 CK2_PHOSPHO_SITE Casein kinase II phosphorylation site. PS00008 MYRISTYL N-myristoylation site. PS00009 AMIDATION Amidation site. PS00435 PEROXIDASE…
SCBFFL4112F05	Sb06g018350.1	S (0.930)	ER (0,97)	YES (0.829)	TMH: 1 (7-29)	OR	Blue copper binding protein (plastocyanin-like)	1	IPR003245 Plastocyanin-like IPR000923 Blue (type 1) copper domain IPR008972 Cupredoxin	PF02298 Plastocyanin-like domain 159-177	PS00006 CK2_PHOSPHO_SITE Casein kinase II phosphorylation site. PS00008 MYRISTYL N-myristoylation site. PS00009 AMIDATION Amidation site. PS00196 COPPER_BLUE Type-1 copper (blue) proteins signature.
SCRFHR1006G03	Sb01g010510.1	S (0.802)	ER (0,93)	YES (0.783)	TMH: 0	OR	Blue copper binding protein (plastocyanin-like)	1	IPR003245 Plastocyanin-like IPR000923 Blue (type 1) copper domain IPR008972 Cupredoxin	PF02298 Plastocyanin-like domain 159-177	PS00004 CAMP_PHOSPHO_SITE cAMP- and cGMP-dependent protein kinase phosphorylation site. PS00005 PKC_PHOSPHO_SITE Protein kinase C phosphorylation site. PS00006 CK2_PHOSPHO_SITE Casein kinase II phosphorylation site. PS00008 MYRISTYL N-myristoylation site. PS00009 AMIDATION Amidation site. PS00196 COPPER_BLUE Type-1 copper (blue) proteins signature.
SCJLLR1104H07	Sb07g011870.1	S (0.948)	ER (0,99)	YES (0.840)	TMH: 1 (177-199)	OR	Blue copper binding protein (plastocyanin-like)	2	IPR003245 Plastocyanin-like IPR008972 Cupredoxin	PF02298 Plastocyanin-like domain 159-177	PS00005 PKC_PHOSPHO_SITE Protein kinase C phosphorylation site. PS00006 CK2_PHOSPHO_SITE Casein kinase II phosphorylation site. PS00008 MYRISTYL N-myristoylation site. PS50310 ALA_RICH Alanine-rich region profile.
SCEPAM1021H07	Sb10g027270.1	S (0.981)	ER (0,98)	YES (0.907)	TMH: 0	OR	Multicopper oxidase	2	IPR001117 Multicopper oxidase, type 1 IPR011707 Multicopper oxidase, type 3 IPR011706 Multicopper oxidase, type 2 IPR008972 Cupredoxin	PF00394 Multicopper oxidase PF07732 Multicopper oxidase PF07731 Multicopper oxidase	PS00001 ASN_GLYCOSYLATION N-glycosylation site. PS00004 CAMP_PHOSPHO_SITE cAMP- and cGMP-dependent protein kinase phosphorylation site. PS00005 PKC_PHOSPHO_SITE Protein kinase C phosphorylation site. PS00006 CK2_PHOSPHO_SITE Casein kinase II phosphorylation site. PS00008 MYRISTYL N-myristoylation site. PS00009 AMIDATION Amidation site.
SCCCAM2002F12	Sb03g038280.1	S (0.948)	ER (0,99)	YES (0.724)	TMH: 1 (7-29)	LM	LTP	1 and 2	IPR016140 Bifunctional inhibitor/plant lipid transfer protein/seed storage helical domain IPR000528 Plant lipid transfer protein/Par allergen	PF14368 Probable lipid transfer	PS00001 ASN_GLYCOSYLATION N-glycosylation site. PS00008 MYRISTYL N-myristoylation site. PS00597 PLANT_LTP Plant lipid transfer proteins signature.
SCBFLR1046E09	Sb03g038280.1	S (0.965)	ER (0,99)	YES (0.698)	TMH: 1 (7-29)	LM	LTP	1 and 2	IPR016140 Bifunctional inhibitor/plant lipid transfer protein/seed storage helical domain IPR000528 Plant lipid transfer protein/Par allergen	PF14368 Probable lipid transfer	PS00001 ASN_GLYCOSYLATION N-glycosylation site. PS00008 MYRISTYL N-myristoylation site. PS00597 PLANT_LTP Plant lipid transfer proteins signature.
SCVPRZ2039B03		S (0.965)	ER (0,99)	YES (0.698)	TMH: 1 (7-29)		LTP	1 and 2
SCVPRZ2041C11		S (0.965)	ER (0,99)	YES (0.698)	TMH: 1 (7-29)		LTP	1 and 2
SCCCLR1072C06	Sb08g002700.1	S (0.771)	ER (0,99)	YES (0.870)	TMH: 0	LM	LTP	1 and 2	IPR016140 Bifunctional inhibitor/plant lipid transfer protein/seed storage helical domain IPR000528 Plant lipid transfer protein/Par allergen	PF14368 Probable lipid transfer	PS00005 PKC_PHOSPHO_SITE Protein kinase C phosphorylation site. PS00006 CK2_PHOSPHO_SITE Casein kinase II phosphorylation site. PS00008 MYRISTYL N-myristoylation site. PS00597 PLANT_LTP Plant lipid transfer proteins signature.
SCEPRT2047G01		S (0.766)	ER (0,99)	YES (0.867)	TMH: 0			1 and 2
SCEZLR1031G07		S (0.770)	ER (0,99)	YES (0.867)	TMH: 0			2
SCRFLR1012A10		S (0.728)	ER (0,99)	YES (0.867)	TMH: 0			2
SCRUSB1064D08		S (0.701)	ER (0,99)	YES (0.869)	TMH: 0			2
SCEPLB1044H04	Sb01g049830.1	S (0.956)	ER (0,99)	YES (0.896)	TMH: 1 (10-32)	LM	LTP	1 and 2	IPR016140 Bifunctional inhibitor/plant lipid transfer protein/seed storage helical domain	PF14368 Probable lipid transfer	PS00008 MYRISTYL N-myristoylation site.
SCEZLB1006F09	Sb08g002670.1	S (0.751)	ER (0,99)	YES (0.854)	TMH: 1 (7-29)	LM	Protease inhibitor/seed storage/LTP family	1 and 2	IPR016140 Bifunctional inhibitor/plant lipid transfer protein/seed storage helical domain IPR000528 Plant lipid transfer protein/Par allergen	PF00234 Protease inhibitor/seed storage/LTP family	PS00006 CK2_PHOSPHO_SITE Casein kinase II phosphorylation site. PS00008 MYRISTYL N-myristoylation site. PS00597 PLANT_LTP Plant lipid transfer proteins signature.
SCCCLR1048F06 - SCCCLR1048F06	Sb08g002690.1	S (0.805)	ER (0,99)	YES (0.876)	TMH: 1 (7-29)	LM	Protease inhibitor/seed storage/LTP family	1 and 2	IPR016140 Bifunctional inhibitor/plant lipid transfer protein/seed storage helical domain IPR000528 Plant lipid transfer protein/Par allergen	PF00234 Protease inhibitor/seed storage/LTP family	PS00006 CK2_PHOSPHO_SITE Casein kinase II phosphorylation site. PS00008 MYRISTYL N-myristoylation site. PS00597 PLANT_LTP Plant lipid transfer proteins signature.
SCBGLR1114E07		S (0.812)	ER (0,99)	YES (0.841)	TMH: 1 (5-27)			2
SCCCCL3004H07.b		S (0.805)	ER (0,99)	YES (0.876)	TMH: 1 (7-29)			2
SCVPHR1092G06		S (0.791)	ER (0,86)	NO	TMH: 1 (13-35)			2
SCUTST3131G03	Sb08g002690.1	S (0.796)	ER (0,99)	YES (0.838)	TMH: 1 (7-29)	LM	Protease inhibitor/seed storage/LTP family	1 and 2	IPR016140 Bifunctional inhibitor/plant lipid transfer protein/seed storage helical domain IPR000528 Plant lipid transfer protein/Par allergen	PF00234 Protease inhibitor/seed storage/LTP family	PS00006 CK2_PHOSPHO_SITE Casein kinase II phosphorylation site. PS00008 MYRISTYL N-myristoylation site. PS00597 PLANT_LTP Plant lipid transfer proteins signature.
SCCCCL3001E03.b	Sb01g033830.1	S (0.754)	ER (0,99)	YES (0.797)	TMH: 2 (155-174)	LM	LTP	2	IPR016140 Bifunctional inhibitor/plant lipid transfer protein/seed storage helical domain	PF14368 Probable lipid transfer	PS00001 ASN_GLYCOSYLATION N-glycosylation site. PS00004 CAMP_PHOSPHO_SITE cAMP- and cGMP-dependent protein kinase phosphorylation site. PS00005 PKC_PHOSPHO_SITE Protein kinase C phosphorylation site. PS00006 CK2_PHOSPHO_SITE Casein kinase II phosphorylation site. PS00008 MYRISTYL N-myristoylation site. PS50310 ALA_RICH Alanine-rich region profile.
SCJFRZ2033G07	Sb08g002700.1	S (0.695)	ER (0,99)	YES (0.865)	TMH: 0	LM	LTP	2	IPR016140 Bifunctional inhibitor/plant lipid transfer protein/seed storage helical domain IPR000528 Plant lipid transfer protein/Par allergen	PF14368 Probable lipid transfer	PS00005 PKC_PHOSPHO_SITE Protein kinase C phosphorylation site. PS00006 CK2_PHOSPHO_SITE Casein kinase II phosphorylation site. PS00008 MYRISTYL N-myristoylation site. PS00597 PLANT_LTP Plant lipid transfer proteins signature.
SCRUFL4024B04		S (0.826)	ER (0,99)	YES (0.790)	TMH: 0			2
SCCCRZ1001H02	Sb03g039880.1	S (0.846)	ER (0,99)	YES (0.728)	TMH: 1 (7-29)	LM	LTP	2	IPR016140 Bifunctional inhibitor/plant lipid transfer protein/seed storage helical domain	PF14368 Probable lipid transfer	PS00005 PKC_PHOSPHO_SITE Protein kinase C phosphorylation site. PS00008 MYRISTYL N-myristoylation site.
SCCCRZ2002G09	Sb06g016170.1	S (0.470)	ER (0,99)	YES (0.826)	TMH: 0	LM	LTP	2	IPR016140 Bifunctional inhibitor/plant lipid transfer protein/seed storage helical domain	PF14368 Probable lipid transfer	PS00005 PKC_PHOSPHO_SITE Protein kinase C phosphorylation site. PS00006 CK2_PHOSPHO_SITE Casein kinase II phosphorylation site. PS00008 MYRISTYL N-myristoylation site. PS00013 PROKAR_LIPOPROTEIN Prokaryotic membrane lipoprotein lipid attachment site.
SCQSFL3039E08.b		S (0.754)	ER (0,99)	YES (0.731)	TMH: 0			2
SCCCLR1024C05	Sb08g002660.1	S (0.458)	ER (0,79)	YES (0.762)	TMH: 1 (10-32)	LM	Protease inhibitor/seed storage/LTP family	2	IPR016140 Bifunctional inhibitor/plant lipid transfer protein/seed storage helical domain IPR000528 Plant lipid transfer protein/Par allergen	PF00234 Protease inhibitor/seed storage/LTP family	PS00004 CAMP_PHOSPHO_SITE cAMP- and cGMP-dependent protein kinase phosphorylation site. PS00005 PKC_PHOSPHO_SITE Protein kinase C phosphorylation site. PS00006 CK2_PHOSPHO_SITE Casein kinase II phosphorylation site. PS00008 MYRISTYL N-myristoylation site. PS00597 PLANT_LTP Plant lipid transfer proteins signature.
SCCCLR1076D05		S (0.537)	ER (0,92)	YES (0.770)	TMH: 1 (10-32)			2
SCEPLB1044H11		S (0.506)	ER (0,95)	YES (0.837)	TMH: 1 (12-31)			2
SCCCLR2C03F01	Sb08g002670.1	S (0.748)	ER (0,99)	YES (0.853)	TMH: 1 (7-29)	LM	Protease inhibitor/seed storage/LTP family	2	IPR016140 Bifunctional inhibitor/plant lipid transfer protein/seed storage helical domain IPR000528 Plant lipid transfer protein/Par allergen	PF00234 Protease inhibitor/seed storage/LTP family	PS00006 CK2_PHOSPHO_SITE Casein kinase II phosphorylation site. PS00008 MYRISTYL N-myristoylation site. PS00597 PLANT_LTP Plant lipid transfer proteins signature.
SCCCRT1003B03	Sb10g003930.1	S (0.886)	ER (0,99)	YES (0.835)	TMH: 1 (7-29)	LM	Lipase GDSL	2	IPR001087 Lipase, GDSL IPR013831 SGNH hydrolase-type esterase domain	PF00657 GDSL-like Lipase/Acylhydrolase	PS00005 PKC_PHOSPHO_SITE Protein kinase C phosphorylation site. PS00006 CK2_PHOSPHO_SITE Casein kinase II phosphorylation site. PS00008 MYRISTYL N-myristoylation site. PS00009 AMIDATION Amidation site.
SCBGLR1023G11	Sb04g029670.1	S (0.914)	ER (0,86)	YES (0.882)	TMH: 1 (12-29)	P	Asp protease (peptidase A1)	1	IPR001461 Peptidase A1 IPR021109 Aspartic peptidase	PF00026 Eukaryotic aspartyl protease PF14543 Xylanase inhibitor N-terminal PF14541 Xylanase inhibitor C-terminal	PS00004 CAMP_PHOSPHO_SITE cAMP- and cGMP-dependent protein kinase phosphorylation site. PS00005 PKC_PHOSPHO_SITE Protein kinase C phosphorylation site. PS00006 CK2_PHOSPHO_SITE Casein kinase II phosphorylation site. PS00007 TYR_PHOSPHO_SITE Tyrosine kinase phosphorylation site. PS00008 MYRISTYL N-myristoylation site.
SCBGLR1097G03	Sb05g027510.1	S (0.918)	ER (0,99)	YES (0.767)	TMH: 0	P	Asp protease (peptidase A1)	1	IPR001461 Peptidase A1 IPR021109 Aspartic peptidase	PF00026 Eukaryotic aspartyl protease PF14543 Xylanase inhibitor N-terminal PF14541 Xylanase inhibitor C-terminal	PS00001 ASN_GLYCOSYLATION N-glycosylation site. PS00004 CAMP_PHOSPHO_SITE cAMP- and cGMP-dependent protein kinase phosphorylation site. PS00005 PKC_PHOSPHO_SITE Protein kinase C phosphorylation site. PS00006 CK2_PHOSPHO_SITE Casein kinase II phosphorylation site. PS00008 MYRISTYL N-myristoylation site.
SCMCLR1123H12	Sb05g027510.1	S (0.965)	ER (0,99)	YES (0.821)	TMH: 0	P	Asp protease (peptidase A1)	1 and 2	IPR001461 Peptidase A1 IPR021109 Aspartic peptidase	PF00026 Eukaryotic aspartyl protease PF14543 Xylanase inhibitor N-terminal PF14541 Xylanase inhibitor C-terminal	PS00001 ASN_GLYCOSYLATION N-glycosylation site. PS00004 CAMP_PHOSPHO_SITE cAMP- and cGMP-dependent protein kinase phosphorylation site. PS00005 PKC_PHOSPHO_SITE Protein kinase C phosphorylation site. PS00006 CK2_PHOSPHO_SITE Casein kinase II phosphorylation site. PS00008 MYRISTYL N-myristoylation site.
SCQGST1032H01	Sb05g027510.1	S (0.955)	ER (0,99)	YES (0.811)	TMH: 1 (5-27)	P	Asp protease (peptidase A1)	1	IPR001461 Peptidase A1 IPR021109 Aspartic peptidase	PF00026 Eukaryotic aspartyl protease PF14543 Xylanase inhibitor N-terminal PF14541 Xylanase inhibitor C-terminal	PS00001 ASN_GLYCOSYLATION N-glycosylation site. PS00004 CAMP_PHOSPHO_SITE cAMP- and cGMP-dependent protein kinase phosphorylation site. PS00005 PKC_PHOSPHO_SITE Protein kinase C phosphorylation site. PS00006 CK2_PHOSPHO_SITE Casein kinase II phosphorylation site. PS00008 MYRISTYL N-myristoylation site.
SCVPLR2012E01	Sb01g044790.1	S (0.821)	ER (0,99)	YES (0.934)	TMH: 0	P	Asp protease (Taxi _N/Taxi_C)	1 and 2	IPR021109 Aspartic peptidase IPR001461 Peptidase A1	PF14541 Xylanase inhibitor C-terminal PF14543 Xylanase inhibitor N-terminal	PS00001 ASN_GLYCOSYLATION N-glycosylation site. PS00005 PKC_PHOSPHO_SITE Protein kinase C phosphorylation site. PS00006 CK2_PHOSPHO_SITE Casein kinase II phosphorylation site. PS00008 MYRISTYL N-myristoylation site.
SCVPRZ2038B09	Sb01g044790.1	S (0.821)	ER (0,99)	YES (0.934)	TMH: 0	P	Asp protease (Taxi _N/Taxi_C)	1 and 2	IPR021109 Aspartic peptidase IPR001461 Peptidase A1	PF14541 Xylanase inhibitor C-terminal PF14543 Xylanase inhibitor N-terminal	PS00001 ASN_GLYCOSYLATION N-glycosylation site. PS00005 PKC_PHOSPHO_SITE Protein kinase C phosphorylation site. PS00006 CK2_PHOSPHO_SITE Casein kinase II phosphorylation site. PS00008 MYRISTYL N-myristoylation site.
SCQGSB1083B11	Sb02g041760.1	S (0.938)	ER (0,99)	YES (0.850)	TMH: 1 (7-24)	P	Asp protease (peptidase A1)	2	IPR001461 Peptidase A1 IPR021109 Aspartic peptidase	PF00026 Eukaryotic aspartyl protease PF14543 Xylanase inhibitor N-terminal PF14541 Xylanase inhibitor C-terminal	PS00001 ASN_GLYCOSYLATION N-glycosylation site. PS00005 PKC_PHOSPHO_SITE Protein kinase C phosphorylation site. PS00006 CK2_PHOSPHO_SITE Casein kinase II phosphorylation site. PS00008 MYRISTYL N-myristoylation site. PS00009 AMIDATION Amidation site.
SCRLRZ3042B09	Sb03g026970.1	S (0.937)	ER (0,99)	YES (0.816)	TMH: 0	P	Asp protease (peptidase A1)	2	IPR001461 Peptidase A1 IPR021109 Aspartic peptidase IPR001969 Peptidase aspartic, active site	PF00026 Eukaryotic aspartyl protease PF14541 Xylanase inhibitor C-terminal PF14543 Xylanase inhibitor N-terminal	PS00001 ASN_GLYCOSYLATION N-glycosylation site. PS00004 CAMP_PHOSPHO_SITE cAMP- and cGMP-dependent protein kinase phosphorylation site. PS00005 PKC_PHOSPHO_SITE Protein kinase C phosphorylation site. PS00006 CK2_PHOSPHO_SITE Casein kinase II phosphorylation site. PS00008 MYRISTYL N-myristoylation site. PS00009 AMIDATION Amidation site. PS50310 ALA_RICH Alanine-rich region profile. PS00141 ASP_PRO…
SCCCST1004B07	Sb01g013970.1	S (0.861)	ER (0,99)	YES (0.847)	TMH: 0	P	protease (Ser protease, subtilisin family, peptidase S8/S53)	2	IPR003137 Protease-associated domain, PA IPR010259 Proteinase inhibitor I9 IPR000209 Peptidase S8/S53 domain IPR015500 Peptidase S8, subtilisin-related IPR023828 Peptidase S8, subtilisin, Ser-active site IPR009020 Proteinase inhibitor, propeptide	PF00082 Subtilase family PF02225 PA domain PF05922 Peptidase inhibitor I9	PS00001 ASN_GLYCOSYLATION N-glycosylation site. PS00003 SULFATION Tyrosine sulfation site. PS00005 PKC_PHOSPHO_SITE Protein kinase C phosphorylation site. PS00006 CK2_PHOSPHO_SITE Casein kinase II phosphorylation site. PS00007 TYR_PHOSPHO_SITE Tyrosine kinase phosphorylation site. PS00008 MYRISTYL N-myristoylation site. PS00583 PFKB_KINASES_1 pfkB family of carbohydrate kinases signature 1. PS001…
SCJFRZ2011B07	Sb06g016860.1	S (0.834)	ER (0,95)	YES (0.832)	TMH: 0	P	protease (Ser protease, subtilisin family, peptidase S8/S53)	2	IPR003137 Protease-associated domain, PA IPR010259 Proteinase inhibitor I9 IPR000209 Peptidase S8/S53 domain IPR015500 Peptidase S8, subtilisin-related IPR023828 Peptidase S8, subtilisin, Ser-active site	PF02225 PA domain PF05922 Peptidase inhibitor I9 PF00082 Subtilase family	PS00001 ASN_GLYCOSYLATION N-glycosylation site. PS00003 SULFATION Tyrosine sulfation site. PS00004 CAMP_PHOSPHO_SITE cAMP- and cGMP-dependent protein kinase phosphorylation site. PS00005 PKC_PHOSPHO_SITE Protein kinase C phosphorylation site. PS00006 CK2_PHOSPHO_SITE Casein kinase II phosphorylation site. PS00007 TYR_PHOSPHO_SITE Tyrosine kinase phosphorylation site. PS00008 MYRISTYL N-myristoyla…
SCCCLR1022B11	Sb06g030800.1	S (0.972)	ER (0,98)	YES (0.932)	TMH: 1 (7-29)	P	protease (Cys protease, papain family, peptidase C1A)	2	IPR000118 Granulin IPR013201 Proteinase inhibitor I29, cathepsin propeptide IPR000668 Peptidase C1A, papain C-terminal IPR013128 Peptidase C1A, papain IPR000169 Cysteine peptidase, cysteine active site IPR025660 Cysteine peptidase, histidine active site IPR025661 Cysteine peptidase, asparagine active site	PF00396 Granulin PF08246 Cathepsin propeptide inhibitor domain (I29) PF00112 Papain family cysteine protease	PS00003 SULFATION Tyrosine sulfation site. PS00004 CAMP_PHOSPHO_SITE cAMP- and cGMP-dependent protein kinase phosphorylation site. PS00005 PKC_PHOSPHO_SITE Protein kinase C phosphorylation site. PS00006 CK2_PHOSPHO_SITE Casein kinase II phosphorylation site. PS00008 MYRISTYL N-myristoylation site. PS50311 CYS_RICH Cysteine-rich region profile. PS00687 ALDEHYDE_DEHYDR_GLU Aldehyde dehydrogenases g…
SCJFLR1013A04	Sb05g026650.1	S (0.988)	ER (0,99)	YES (0.903)	TMH: 1 (5-24)	ID	Ser protease inhibitor (Bowman-Birk)	1	IPR000877 Proteinase inhibitor I12, Bowman-Birk	PF00228 Bowman-Birk serine protease inhibitor family	PS00004 CAMP_PHOSPHO_SITE cAMP- and cGMP-dependent protein kinase phosphorylation site. PS00008 MYRISTYL N-myristoylation site. PS50311 CYS_RICH Cysteine-rich region profile.
SCRUFL3062D08 - SCRUFL3062D08								1 and 2
SCRUAD1063C06	Sb09g000430.1	S (0.550)	none (0,71)	NO	TMH: 1 (13-32)	S	leucine-rich repeat (LRR) receptor kinase	2	IPR013210 Leucine-rich repeat-containing N-terminal, type 2 IPR025875 Leucine rich repeat 4	PF08263 Leucine rich repeat N-terminal domain PF12799 Leucine Rich repeats (2 copies)	PS00001 ASN_GLYCOSYLATION N-glycosylation site. PS00005 PKC_PHOSPHO_SITE Protein kinase C phosphorylation site. PS00006 CK2_PHOSPHO_SITE Casein kinase II phosphorylation site. PS00008 MYRISTYL N-myristoylation site.
SCEZRZ1014C04	Sb03g039330.1	S (0.978)	ER (0,99)	YES (0.801)	TMH: 1 (7-29)	M	thaumatin	1 and 2	IPR001938 Thaumatin	PF00314 Thaumatin family	PS00001 ASN_GLYCOSYLATION N-glycosylation site. PS00005 PKC_PHOSPHO_SITE Protein kinase C phosphorylation site. PS00006 CK2_PHOSPHO_SITE Casein kinase II phosphorylation site. PS00008 MYRISTYL N-myristoylation site. PS00013 PROKAR_LIPOPROTEIN Prokaryotic membrane lipoprotein lipid attachment site.
SCCCLR2003G06	Sb08g018720.1	S (0.520)	ER (0,85)	YES (0.822)	TMH: 1 (13-35)	M	thaumatin	2	IPR001938 Thaumatin	PF00314 Thaumatin family	PS00005 PKC_PHOSPHO_SITE Protein kinase C phosphorylation site. PS00006 CK2_PHOSPHO_SITE Casein kinase II phosphorylation site. PS00008 MYRISTYL N-myristoylation site.
SCUTLR1037F02		S (0.703)	ER (0,99)	NO	TMH: 0			2
SCCCSD1003E02	Sb08g022410.1	S (0.979)	ER (0,99)	YES (0.925)	TMH: 1 (5-27)	M	thaumatin	2	IPR001938 Thaumatin IPR017949 Thaumatin, conserved site	PF00314 Thaumatin family	PS00005 PKC_PHOSPHO_SITE Protein kinase C phosphorylation site. PS00006 CK2_PHOSPHO_SITE Casein kinase II phosphorylation site. PS00007 TYR_PHOSPHO_SITE Tyrosine kinase phosphorylation site. PS00008 MYRISTYL N-myristoylation site. PS00316 THAUMATIN Thaumatin family signature.
SCRUHR1076B06	Sb08g022410.1	S (0.963)	ER (0,99)	YES (0.904)	TMH: 1 (5-27)	M	thaumatin	2	IPR001938 Thaumatin IPR017949 Thaumatin, conserved site	PF00314 Thaumatin family	PS00005 PKC_PHOSPHO_SITE Protein kinase C phosphorylation site. PS00006 CK2_PHOSPHO_SITE Casein kinase II phosphorylation site. PS00007 TYR_PHOSPHO_SITE Tyrosine kinase phosphorylation site. PS00008 MYRISTYL N-myristoylation site. PS00316 THAUMATIN Thaumatin family signature.
SCVPRT2073B04	Sb08g022420.1	S (0.962)	ER (0,99)	YES (0.877)	TMH: 1 (7-29)	M	thaumatin	2	IPR001938 Thaumatin IPR017949 Thaumatin, conserved site	PF00314 Thaumatin family	PS00005 PKC_PHOSPHO_SITE Protein kinase C phosphorylation site. PS00006 CK2_PHOSPHO_SITE Casein kinase II phosphorylation site. PS00008 MYRISTYL N-myristoylation site. PS00316 THAUMATIN Thaumatin family signature.
SCBGRT1047G10	Sb02g004500.1	S (0.962)	ER (0,98)	YES (0.687)	TMH: 0	M	germin	2	IPR006045 Cupin 1 IPR011051 RmlC-like cupin domain IPR001929 Germin IPR019780 Germin, manganese binding site IPR014710 RmlC-like jelly roll fold	PF00190 Cupin	PS00001 ASN_GLYCOSYLATION N-glycosylation site. PS00005 PKC_PHOSPHO_SITE Protein kinase C phosphorylation site. PS00006 CK2_PHOSPHO_SITE Casein kinase II phosphorylation site. PS00008 MYRISTYL N-myristoylation site. PS00725 GERMIN Germin family signature.
SCCCLR2C02D04	Sb09g004970.1	S (0.977)	ER (0,99)	YES (0.875)	TMH: 1 (5-24)	M	germin	2	IPR006045 Cupin 1 IPR011051 RmlC-like cupin domain IPR001929 Germin IPR019780 Germin, manganese binding site IPR014710 RmlC-like jelly roll fold	PF00190 Cupin	PS00006 CK2_PHOSPHO_SITE Casein kinase II phosphorylation site. PS00008 MYRISTYL N-myristoylation site. PS00725 GERMIN Germin family signature.
SCCCRZ1C01H06	Sb08g001950.1	S (0.929)	ER (0,99)	YES (0.779)	TMH: 0	M	nucleoside phosphatase family	1 and 2	IPR000407 Nucleoside phosphatase GDA1/CD39	PF01150 GDA1/CD39 (nucleoside phosphatase) family	PS00001 ASN_GLYCOSYLATION N-glycosylation site. PS00003 SULFATION Tyrosine sulfation site. PS00005 PKC_PHOSPHO_SITE Protein kinase C phosphorylation site. PS00006 CK2_PHOSPHO_SITE Casein kinase II phosphorylation site. PS00008 MYRISTYL N-myristoylation site. PS00009 AMIDATION Amidation site. PS01238 GDA1_CD39_NTPASE GDA1/CD39 family of nucleoside phosphatases signature.
SCJLRT3078H06	Sb05g025670.1	S (0.970)	ER (0,99)	YES (0.772)	TMH: 1 (7-29)	M	dirigent protein	1	IPR004265 Plant disease resistance response protein	PF03018 Dirigent-like protein	PS00005 PKC_PHOSPHO_SITE Protein kinase C phosphorylation site. PS00008 MYRISTYL N-myristoylation site.
SCVPRT2073B08	Sb10g001940.1	S (0.941)	ER (0,99)	YES (0.726)	TMH: 1 (7-29)	M	SCP-like extracellular protein	2	IPR014044 CAP domain IPR018244 Allergen V5/Tpx-1-related, conserved site IPR002413 Ves allergen IPR001283 Allergen V5/Tpx-1-related	PF00188 SCP-like extracellular protein	PS00005 PKC_PHOSPHO_SITE Protein kinase C phosphorylation site. PS00006 CK2_PHOSPHO_SITE Casein kinase II phosphorylation site. PS00008 MYRISTYL N-myristoylation site. PS01009 CRISP_1 CRISP family signature 1. PS01010 CRISP_2 CRISP family signature 2.
SCCCCL4009G04	Sb01g004270.1	S (0.758)	ER (0,99)	YES (0.755)	TMH: 0	UF	unknown function (DUF642)	1 and 2	IPR006946 Protein of unknown function DUF642 IPR008979 Galactose-binding domain-like	PF04862 Protein of unknown function (DUF642)	PS00001 ASN_GLYCOSYLATION N-glycosylation site. PS00005 PKC_PHOSPHO_SITE Protein kinase C phosphorylation site. PS00008 MYRISTYL N-myristoylation site.
SCSGLR1084A12	Sb01g004270.1	S (0.758)	ER (0,99)	YES (0.755)	TMH: 0	UF	unknown function (DUF642)	1 and 2	IPR006946 Protein of unknown function DUF642 IPR008979 Galactose-binding domain-like	PF04862 Protein of unknown function (DUF642)	PS00001 ASN_GLYCOSYLATION N-glycosylation site. PS00005 PKC_PHOSPHO_SITE Protein kinase C phosphorylation site. PS00008 MYRISTYL N-myristoylation site.
SCCCLB1001G04	Sb03g027650.1	S (0.830)	ER (0,99)	YES (0.925)	TMH: 0	UF	unknown function (DUF642)	1	IPR006946 Protein of unknown function DUF642 IPR008979 Galactose-binding domain-like	PF04862 Protein of unknown function (DUF642)	PS00001 ASN_GLYCOSYLATION N-glycosylation site. PS00005 PKC_PHOSPHO_SITE Protein kinase C phosphorylation site. PS00008 MYRISTYL N-myristoylation site. PS00009 AMIDATION Amidation site.
SCVPLR2027A11	Sb07g026630.1	S (0.761)	ER (0,99)	YES (0.791)	TMH: 2 (234-256) (257-258)	UF	unknown function (DUF568)	2	IPR017214 Uncharacterised conserved protein UCP037471 IPR005018 DOMON domain	PF04526 Protein of unknown function (DUF568)	PS00001 ASN_GLYCOSYLATION N-glycosylation site. PS00005 PKC_PHOSPHO_SITE Protein kinase C phosphorylation site. PS00006 CK2_PHOSPHO_SITE Casein kinase II phosphorylation site. PS00008 MYRISTYL N-myristoylation site. PS50836 DOMON DOMON domain profile.
SCCCRZ3002G10	Sb01g031470.1	S (0.967)	ER (0,99)	YES (0.849)	TMH: 1 (7-26)	UF	homologous to phloem filament protein 1 (Cucurbita phloem)	1 and 2	IPR009994 Phloem filament PP1 IPR027214 Cystatin IPR020381 Proteinase inhibitor I25, cystatin, conserved region IPR000010 Proteinase inhibitor I25, cystatin	PF07430 Phloem filament protein PP1	PS00005 PKC_PHOSPHO_SITE Protein kinase C phosphorylation site.
SCEZRT2018F03	Sb01g031470.1	S (0.967)	ER (0,99)	YES (0.849)	TMH: 1 (7-26)	UF	homologous to phloem filament protein 1 (Cucurbita phloem)	1	IPR009994 Phloem filament PP1 IPR027214 Cystatin IPR020381 Proteinase inhibitor I25, cystatin, conserved region IPR000010 Proteinase inhibitor I25, cystatin	PF07430 Phloem filament protein PP1	PS00005 PKC_PHOSPHO_SITE Protein kinase C phosphorylation site.
SCEZLB1013B06	Sb10g001440.1	S (0.932)	ER (0,99)	YES (0.813)	TMH: 0	UF	homologous to phloem filament protein 1 (Cucurbita phloem)	1	IPR021109 Aspartic peptidase IPR001461 Peptidase A1	PF14541 Xylanase inhibitor C-terminal PF14543 Xylanase inhibitor N-terminal	PS00001 ASN_GLYCOSYLATION N-glycosylation site. PS00004 CAMP_PHOSPHO_SITE cAMP- and cGMP-dependent protein kinase phosphorylation site. PS00005 PKC_PHOSPHO_SITE Protein kinase C phosphorylation site. PS00006 CK2_PHOSPHO_SITE Casein kinase II phosphorylation site. PS00008 MYRISTYL N-myristoylation site. PS00307 LECTIN_LEGUME_BETA Legume lectins beta-chain signature.
SCSFST1066G10	Sb08g018710.1	S (0.993)	ER (0,99)	YES (0.847)	TMH: 1 (10-32)	UF	expressed protein	1 and 2	-	-	PS00004 CAMP_PHOSPHO_SITE cAMP- and cGMP-dependent protein kinase phosphorylation site. PS00005 PKC_PHOSPHO_SITE Protein kinase C phosphorylation site. PS00006 CK2_PHOSPHO_SITE Casein kinase II phosphorylation site. PS00008 MYRISTYL N-myristoylation site.
SCRUFL4024B08.b	Sb08g018710.1	S (0.974)	ER (0,98)	YES (0.832)	TMH: 0	UF	expressed protein	1 and 2	-	-	PS00004 CAMP_PHOSPHO_SITE cAMP- and cGMP-dependent protein kinase phosphorylation site. PS00005 PKC_PHOSPHO_SITE Protein kinase C phosphorylation site. PS00006 CK2_PHOSPHO_SITE Casein kinase II phosphorylation site. PS00008 MYRISTYL N-myristoylation site.
SCCCRZ2004B02	Sb03g000700.1	S (0.990)	ER (0,99)	YES (0.612)	TMH: 1 (13-35)	UF	DREPP plasma membrane polypeptide	2	IPR008469 DREPP plasma membrane polypeptide	PF05558 DREPP plasma membrane polypeptide	PS00001 ASN_GLYCOSYLATION N-glycosylation site. PS00003 SULFATION Tyrosine sulfation site. PS00004 CAMP_PHOSPHO_SITE cAMP- and cGMP-dependent protein kinase phosphorylation site. PS00005 PKC_PHOSPHO_SITE Protein kinase C phosphorylation site. PS00006 CK2_PHOSPHO_SITE Casein kinase II phosphorylation site. PS00009 AMIDATION Amidation site. PS50310 ALA_RICH Alanine-rich region profile. PS50313 GLU_…
SCCCLR1079C11	Sb04g011100.1	S (0.858)	possibly mitochondrial (0,22)	NO	TMH: 0	UF	DREPP plasma membrane polypeptide	2	IPR008469 DREPP plasma membrane polypeptide	PF05558 DREPP plasma membrane polypeptide	PS00004 CAMP_PHOSPHO_SITE cAMP- and cGMP-dependent protein kinase phosphorylation site. PS00005 PKC_PHOSPHO_SITE Protein kinase C phosphorylation site. PS00006 CK2_PHOSPHO_SITE Casein kinase II phosphorylation site. PS00008 MYRISTYL N-myristoylation site. PS00009 AMIDATION Amidation site. PS50310 ALA_RICH Alanine-rich region profile.
SCAGLR2011E04/SCEPAM2057B02	Sb08g003040.1	S (0.760)	none (0,99)	YES (0.793)	TMH: 0	UF	expressed protein (alpha/beta barrel)	2	IPR013097 Stress responsive alpha-beta barrel IPR011008 Dimeric alpha-beta barrel	PF07876 Stress responsive A/B Barrel Domain	-
SCEPLR1051E09								2
